# Supplementary material for: High-dose versus low-dose prednisolone in symptomatic patients with post-COVID-19 diffuse parenchymal lung abnormalities: an open-label, randomised trial (the COLDSTER trial)
Source: PubMed Central journal article supplement — Eur Respir J. 2022 Feb 17;59(2):2102930. doi: 10.1183/13993003.02930-2021 (PMC8850687; doi:10.1183/13993003.02930-2021), 2022-02-17

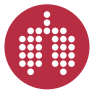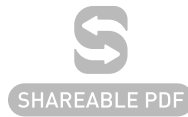

# High-dose *versus* low-dose prednisolone in symptomatic patients with post-COVID-19 diffuse parenchymal lung abnormalities: an open-label, randomised trial (the COLDSTER trial)

Sahajal Dhooria<sup>1,5</sup>, Shivani Chaudhary<sup>1,5</sup>, Inderpaul Singh Sehgal <sup>1</sup>, Ritesh Agarwal<sup>1</sup>, Siddhant Arora<sup>2</sup>, Mandeep Garg<sup>3</sup>, Nidhi Prabhakar<sup>3</sup>, Goverdhan Dutt Puri<sup>4</sup>, Ashish Bhalla<sup>2</sup>, Vikas Suri<sup>2</sup>, Lakshmi Narayana Yaddanapudi<sup>4</sup>, Valliappan Muthu<sup>1</sup>, Kuruswamy Thurai Prasad<sup>1</sup> and Ashutosh Nath Aggarwal<sup>1</sup>

<sup>1</sup>Dept of Pulmonary Medicine, Postgraduate Institute of Medical Education and Research (PGIMER), Chandigarh, India. <sup>2</sup>Dept of Medicine, Postgraduate Institute of Medical Education and Research (PGIMER), Chandigarh, India. <sup>3</sup>Dept of Radiodiagnosis and Imaging, Postgraduate Institute of Medical Education and Research (PGIMER), Chandigarh, India. <sup>4</sup>Dept of Anaesthesia and Intensive Care, Postgraduate Institute of Medical Education and Research (PGIMER), Chandigarh, India. <sup>5</sup>These authors contributed equally to the manuscript and may be considered as first authors.

Corresponding author: Sahajal Dhooria ([sahajal@gmail.com](mailto:sahajal@gmail.com))

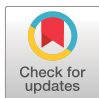

Shareable abstract (@ERSpublications)

High-dose prednisolone may not be superior to a low-dose 6-week regimen in improving clinical, physiological and radiological outcomes, or health-related quality of life, in patients with symptomatic post-COVID-19 diffuse parenchymal lung abnormalities <https://bit.ly/32zqnXt>

**Cite this article as:** Dhooria S, Chaudhary S, Sehgal IS, *et al.* High-dose *versus* low-dose prednisolone in symptomatic patients with post-COVID-19 diffuse parenchymal lung abnormalities: an open-label, randomised trial (the COLDSTER trial). *Eur Respir J* 2022; 59: 2102930 [DOI: 10.1183/13993003.02930-2021].

This single-page version can be shared freely online.

Copyright ©The authors 2022.

This version is distributed under the terms of the Creative Commons Attribution Non-Commercial Licence 4.0. For commercial reproduction rights and permissions contact [permissions@ersnet.org](mailto:permissions@ersnet.org)

Received: 21 Sept 2021  
Accepted: 22 Nov 2021

*To the Editor:*

In some patients, respiratory symptoms and imaging abnormalities persist after acute coronavirus disease 2019 (COVID-19) pneumonia [1–3]. Chest computed tomography (CT) scans generally show diffuse parenchymal lung abnormalities consistent with organising pneumonia [4]. It has been proposed that the novel severe acute respiratory syndrome coronavirus 2 (SARS-CoV-2) could act as a trigger to exalt the presence of pre-existing interstitial lung abnormalities encountered in the general population, especially in smokers. Previous observational studies reported improvement with glucocorticoids in symptomatic patients with post-COVID-19 diffuse parenchymal lung abnormalities (PC-DPLAS) [4–6]. A recent guideline recommended glucocorticoids for treating PC-DPLAS [3]. However, there are no randomised controlled trials on therapies for this condition.

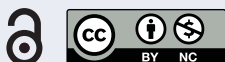

Supplement: ERJ-02930-2021.Shareable.pdf [file ERJ-02930-2021.Shareable.pdf]
